# Supplementary material for: Lack of Relationship between Fibrosis-Related Biomarkers and Cardiac Magnetic Resonance-Assessed Replacement and Interstitial Fibrosis in Dilated Cardiomyopathy
Source: MDPI journal article supplement (doi:10.3390/cells10061295), 2021-05-23
Supplement: s1 [file s1]

**Table S1.** Comparison of baseline characteristics and circulating markers of fibrosis between DCM patients and control group.

| Parameter                | DCM patients (n=100) | Control group (n=27) | p-value |
|--------------------------|----------------------|----------------------|---------|
| Age [years]              | 45.2 ± 11.8          | 40.9 ± 12.3          | 0.24    |
| Male sex (n, %)          | 87 (87)              | 21 (77.8)            | 0.79    |
| BMI [kg/m <sup>2</sup> ] | 28.5 ± 5.7           | 24.83 ± 3.75         | 0.05    |
| LVEDd [mm]               | 63.8 ± 8.2           | 45.00 ± 7.24         | <0.001  |
| EF [%]                   | 29.7 ± 10.1          | 58.60 ± 2.51         | <0.001  |
| Cardiotrophin-1 [pg/ml]  | 138.9 ± 194.3        | 38.1 ± 21.1          | <0.001  |
| PDGF-BB [pg/ml]          | 363.7 ± 453.6        | 87.4 ± 37.9          | <0.001  |
| GDF-15 [pg/ml]           | 38.9 ± 41.1          | 17.8 ± 11.6          | <0.01   |
| PICP [ng/ml]             | 203.5 ± 260.5        | 55.1 ± 50.8          | <0.003  |
| PIIINP [ng/L]            | 366.6 ± 412.1        | 96.3 ± 15.9          | <0.01   |
| CTX-I [ng/ml]            | 0.31 ± 0.12          | 0.16 ± 0.12          | <0.001  |
